# Supplementary material for: Host Factors Genes BcCLC1 and BcCLC2 Confer Turnip Mosaic Virus Resistance in Non-Heading Chinese Cabbage (Brassica campestris ssp. chinensis)
Source: MDPI journal article supplement (doi:10.3390/plants12122269), 2023-06-10
Supplement: s1 [file s1]

| Protein | Sequence                                                                         | Position |
|---------|----------------------------------------------------------------------------------|----------|
| AiCLC1  | MATFDDGDPAQAHTSPSEHDDGGYDNFSEAAQPPVHQSSGGFSSFGNDPASPNGYGFASSPNHDFSSPFESSVNDANG   | 80       |
| BcCLC1  | MATFDDGDPAQAHTSPTEHDDSFMSYENFSAPPAGFSSFGNDGSENPASPNGYGFMASS                      | 62       |
| AiCLC1  | NGGSSGGDAIFASDGFILPDPNEMREEGQRRREWRRLNTHILEEKEKKEKEMRNQITAEADPKKAFYEKRDKTITETNKT | 160      |
| BcCLC1  | SPNNGDAIFASDGFILPDPNEMREEGQRRREWRRLNTHILEEKEKKEKEMRNQITAEADPKKAFYEKRDKTITETNKA   | 142      |
| AiCLC1  | DNREAEKLYWNQEKHFHKEVDKHYWKAIAELIPREVNPNIKKRGKDPDKKPSVNVYIQGPKGKPTDLGRMRQIFLKLKT  | 240      |
| BcCLC1  | DNREAEKLYWNQEKHFHKEVDKHYWKAIAELIPREVNPNIKKRGKDPDKKPSVNVYIQGPKGKPTDLGRMRQIFLKLKT  | 222      |
| AiCLC1  | NPPPHMMPPPPPAKDAKDADKADKGDAKDKDKDAKGGKDAKDLKDKPAADPKTTEEKRFSPAKDASVETAKTPAAAS    | 320      |
| BcCLC1  | NPPPHMMPPPPPPAKDAKDAKEGKDAKGDADKDKKPAABKKRPAETATMAEEKPASPAKDASVETAKTPAAAA        | 296      |
| AiCLC1  | GECEKPVVTEVEGTAKE---                                                             | 338      |
| BcCLC1  | AAAGSGEKEKPVVEAEAKAE                                                             | 317      |

Pfam  
Clathrin\_Ig\_ch

0 100 200 300

**Figure S1.** Amino acid sequence alignment of BcCLC1 and AtCLC1 and structural domain analysis of BcCLC1. **(a)**Comparative amino acid sequences of BcCLC1 and AtCLC1. The amino acid sequence identity between BcCLC1 and AtCLC1 was 63.05% and the similarity rate was 70.67%. Black background indicates perfect agreement, grey background indicates conserved regions; **(b)** SMART structural domain analysis of BcCLC1, the grey background indicates that the grey line segment is the full length of the amino acid and the red rectangle indicates the low complexity region, with the ruler in the lower part.

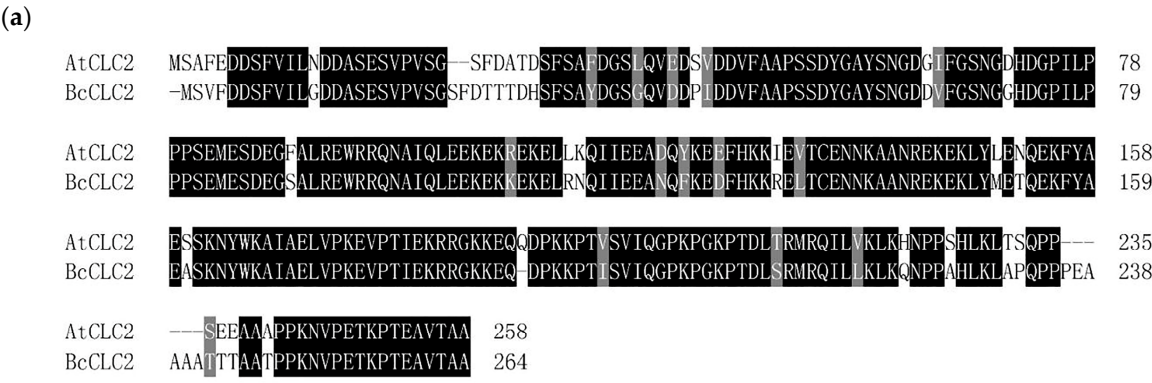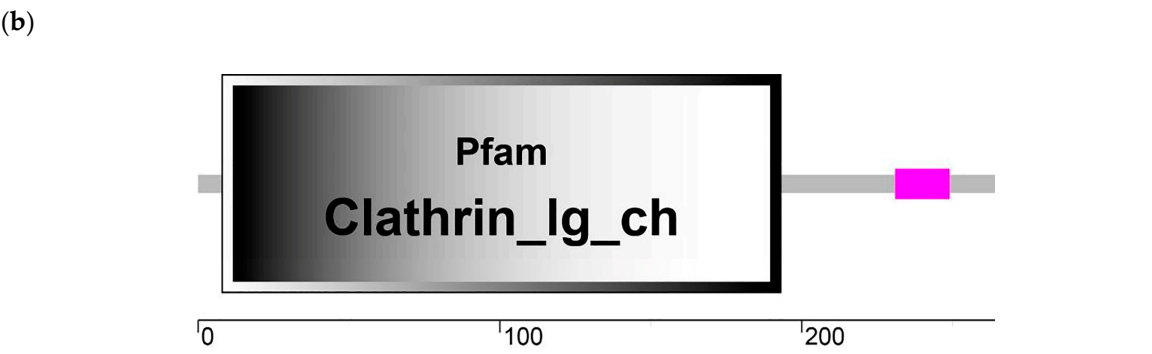

**Figure S2.** Amino acid sequence alignment of BcCLC2 and AtCLC2 and structural domain analysis of BcCLC2. (a)Comparative amino acid sequences of BcCLC2 and AtCLC2. The amino acid sequence identity between BcCLC2 and AtCLC2 was 80.45% and the similarity rate was 85.71%. Black background indicates perfect agreement, grey background indicates conserved regions; (b) SMART structural domain analysis of BcCLC2, the grey background indicates that the grey line segment is the full length of the amino acid and the red rectangle indicates the low complexity region, with the ruler in the lower part.

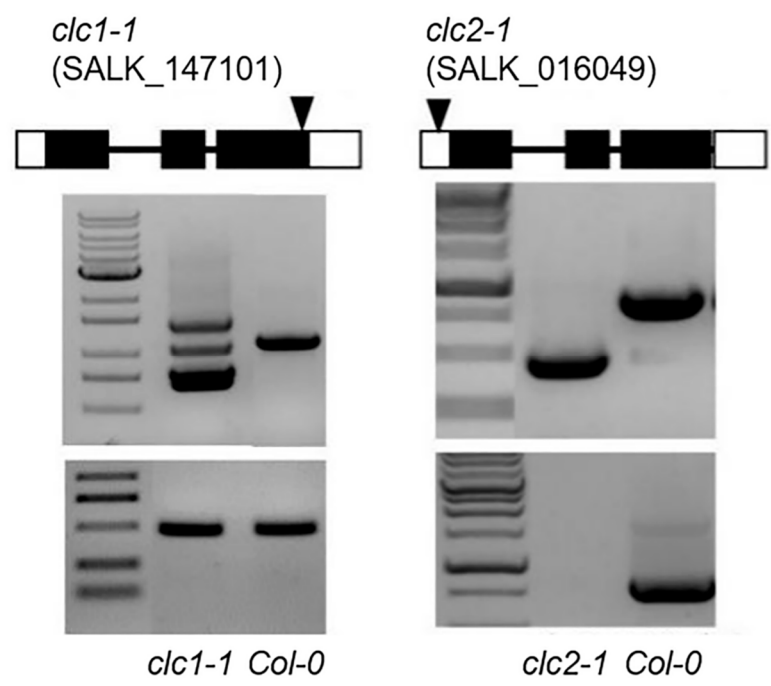

**Figure S3.** The identification of AtCLCs mutants. White rectangles denote 5'UTR or 3'UTR, black rectangles represent exons, black line segments represent introns and black arrows represent T-DNA insertion sites.

**Table S1.** The correspondence between NHCC and Chinese cabbage Clathrin proteins

| Num | NHCC_genes      | At_genes      | e-value   | chr | Strand | pos_start | pos_end  | length | Protein length | MV      | PI   |
|-----|-----------------|---------------|-----------|-----|--------|-----------|----------|--------|----------------|---------|------|
| 1   | BraC09g064010.1 | <i>AtCLC1</i> | 2.00E-132 | A09 | +      | 59541847  | 59543654 | 954    | 318            | 34.8kDa | 5.74 |
| 2   | BraC03g021570.1 | <i>AtCLC2</i> | 7.00E-142 | A03 | +      | 10760457  | 10762086 | 795    | 265            | 29.2kDa | 5.10 |
| 3   | BraC05g006400.1 |               | 2.00E-131 | A05 | -      | 3593438   | 3594647  | 741    | 247            | 27.3kDa | 5.44 |
| 4   | BraC04g030120.1 |               | 1.00E-114 | A04 | +      | 21291217  | 21292532 | 699    | 233            | 25.9kDa | 5.29 |

chr: chromosome; MV: molecular weight; PI: isoelectric point.

**Table S2.** The correspondence between NHCC and Chinese cabbage

| Query Item      | String Id          | Identity | Bit score | Preferred Name | Annotation           |
|-----------------|--------------------|----------|-----------|----------------|----------------------|
| BraC09g064010.1 | 3711.Bra031138.1-P | 99.6     | 387.1     | Bra031138.1-P  | Clathrin light chain |
| BraC03g021570.1 | 3711.Bra000163.1-P | 100      | 444.5     | Bra000163.1-P  | Clathrin light chain |

**Table S3.** Primers were used in this study

| Primer                  | Sequence(5'-3')                                     |
|-------------------------|-----------------------------------------------------|
| <b>For gene cloning</b> |                                                     |
| gw- <i>BcCLC1</i> -F    | ggggacaactttgtacaaaaagtggcatggcGACTTTCGATGACGGA     |
| gw- <i>BcCLC1</i> -R    | ggggacaactttgtacaagaaagtgggcaCTCTGCCTTGGCTCCCTCAG   |
| gw- <i>BcCLC2.1</i> -F  | ggggacaactttgtacaaaaagtggcATGTCTGTCTTTGACGATTCCTTCG |
| gw- <i>BcCLC2.1</i> -R  | ggggacaactttgtacaagaaagtgggcaAGCAGCAGTAACTGCCTCGG   |
| <b>For Y2H</b>          |                                                     |

---

|                  |                                            |
|------------------|--------------------------------------------|
| PPR3N-BcCLC1-F   | gagtggccattacggccATGGCGACTTTCGATGACGG      |
| PPR3N-BcCLC1-R   | gagaggccgaggcggccgCTCTGCCTTGGCTCCCTCAG     |
| PPR3N-BcCLC2.1-F | gagtggccattacggccATGTCTGTCTTTGACGATTCCTTCG |
| PPR3N-BcCLC2.1-R | gagaggccgaggcggccgAGCAGCAGTAACTGCCTCGG     |

**For qRT-PCR**

|                         |                       |
|-------------------------|-----------------------|
| <i>BcACTIN</i> -qPCR-F  | GTTGCTATCCAGGCTGTTCT  |
| <i>BcACTIN</i> -qPCR-R  | AGCGTGAGGAAGAGCATAAC  |
| <i>AtActin2</i> -qPCR-F | CACCACAACAGCAGAGCGGGA |
| <i>AtActin2</i> -qPCR-R | TCCCACAAACGAGGGCTGGA  |
| <i>BcCLC1</i> -qPCR-F   | CCGTCAAAACGCACTTCACC  |
| <i>BcCLC1</i> -qPCR-R   | GGCCTTCTTGTATTCGTCAGC |
| <i>BcCLC2</i> -qPCR-F   | GTCTCAGGCTCATTCGACACC |
| <i>BcCLC2</i> -qPCR-R   | TCCGTTGAGTAAGCTCCGTA  |
| TuMV-CP-qPCR-F          | TGGCTGATTACGAACTGACG  |
| TuMV-CP-qPCR-R          | CTGCCTAAATGTGGGTTTG   |

**For mutant identification**

|                |                           |
|----------------|---------------------------|
| LBb1.3         | ATTTTGCCGATTTCGGAAC       |
| SALK_147101-LP | CATGCCCCACTCTCTCTAATG     |
| SALK_147101-RP | GCATTACTGGAAAGCAA TTGC    |
| SALK_016049-LP | GCTCAATGATTGTGCCAATTC     |
| SALK_016049-RP | GCCATAGCACGAAATCAGATC     |
| CS100219-LP    | GACGGAGGAAACTTCACG GCTTAC |
| CS100219-RP    | CACTCACACTCACATTCGGGTCAG  |

---

**Table S4.** Sequences for constrction of the VIGS vector

| Gene Name     | Sequence (5'-3')                                                                     |
|---------------|--------------------------------------------------------------------------------------|
| <i>BcCLC1</i> | GTGAGTGGCGCCGTCAAACGCACTTCACCTCGAGGAGAATTCTCCT<br>CGAGGTGAAGTGCCTTTTGACGGCGCCACTCAC  |
| <i>BcCLC2</i> | ATGACCCCATCGACGATGTTTTCGCAGCGCCGTCCTCCGATCGGAGG<br>ACGGCGCTGCGAAAACATCGTCGATGGGGTCAT |
